# Supplementary material for: Bi2Se3 nanoplates for contrast-enhanced photoacoustic imaging at 1064 nm
Source: Royal Society of Chemistry journal article supplement (doi:10.1039/c8nr05672b), 2018-01-01
Supplement: c8nr05672b1.pdf [file c8nr05672b1.pdf]

## Supplementary Information

### **Bi<sub>2</sub>Se<sub>3</sub> Nanoplates for Contrast-enhanced Photoacoustic Imaging at 1064 nm**

Sara Park,<sup>§a</sup> Gyeongbae Park,<sup>§b</sup> Jeesu Kim,<sup>a</sup> Wonseok Choi,<sup>a</sup> Unyong Jeong,<sup>\*b</sup> and Chulhong Kim<sup>\*b</sup>

<sup>a</sup>Departments of Creative IT Engineering and Electrical Engineering, Pohang University of Science and Technology (POSTECH), 77 Cheongam-Ro, Nam-Gu, Pohang, Gyeongbuk, 37673, Republic of Korea.

<sup>b</sup>Department of Materials Science and Engineering, Pohang University of Science and Technology (POSTECH), 77 Cheongam-Ro, Nam-Gu, Pohang, Gyeongbuk, 37673, Republic of Korea.

\*Corresponding author: [chulhong@postech.edu](mailto:chulhong@postech.edu) and [ujeong@postech.ac.kr](mailto:ujeong@postech.ac.kr)

<sup>§</sup>These authors contributed equally to this work.

#### **E-mail address:**

Sara Park: [sarapark@postech.ac.kr](mailto:sarapark@postech.ac.kr)

Gyeongbae Park: [rochellesalt@postech.ac.kr](mailto:rochellesalt@postech.ac.kr)

Jeesu Kim: [hybridjs@postech.ac.kr](mailto:hybridjs@postech.ac.kr)

Wonseok Choi: [zoids1215@postech.ac.kr](mailto:zoids1215@postech.ac.kr)

Unyong Jeong: [ujeong@postech.ac.kr](mailto:ujeong@postech.ac.kr)

Chulhong Kim: [chulhong@postech.edu](mailto:chulhong@postech.edu)

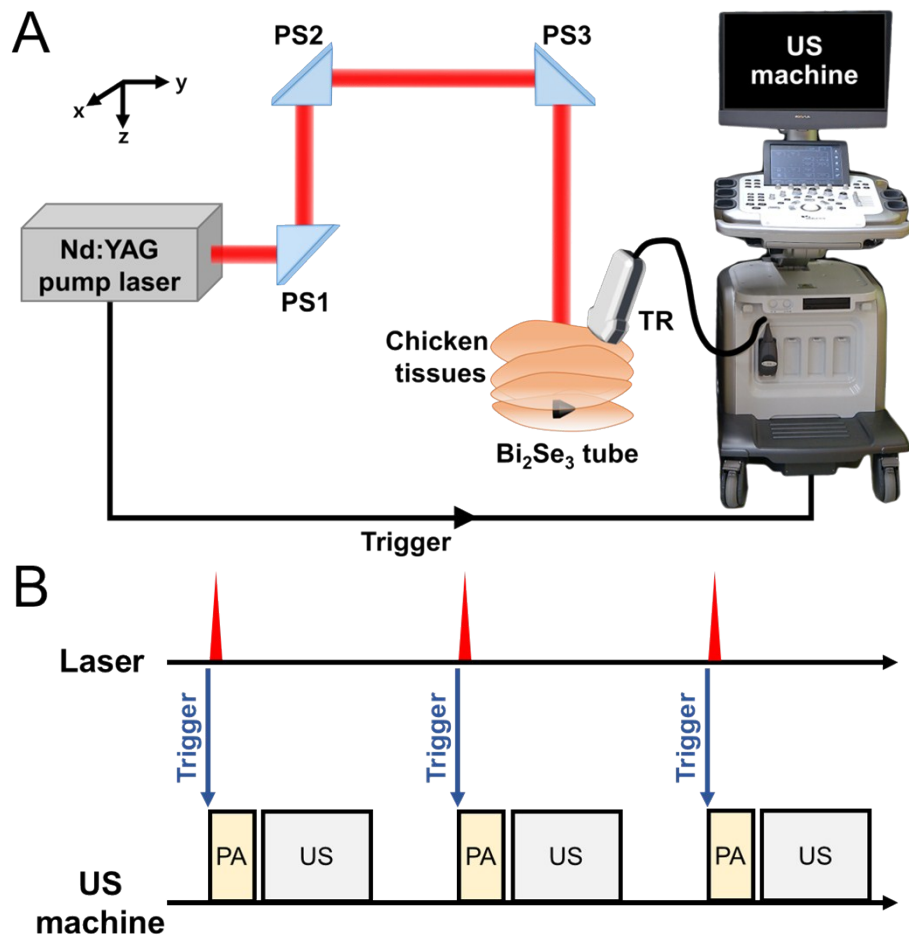

**Fig. S1** Schematic of deep tissue PA imaging. (A) Experimental setup. (B) Synchronized timing sequence. PA, photoacoustic; PS, prism; US, ultrasound; TR, ultrasound transducer.

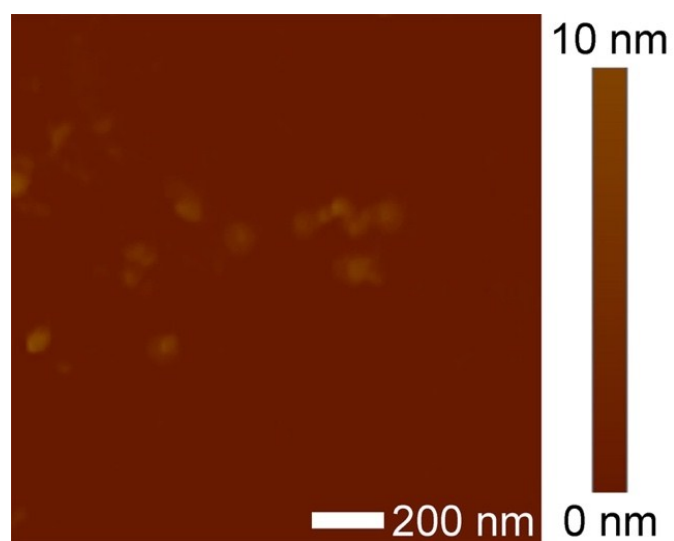

**Fig. S2** AFM image of Bi<sub>2</sub>Se<sub>3</sub> nanoplates spin-coated on the Si substrate. AFM, atomic force microscope.

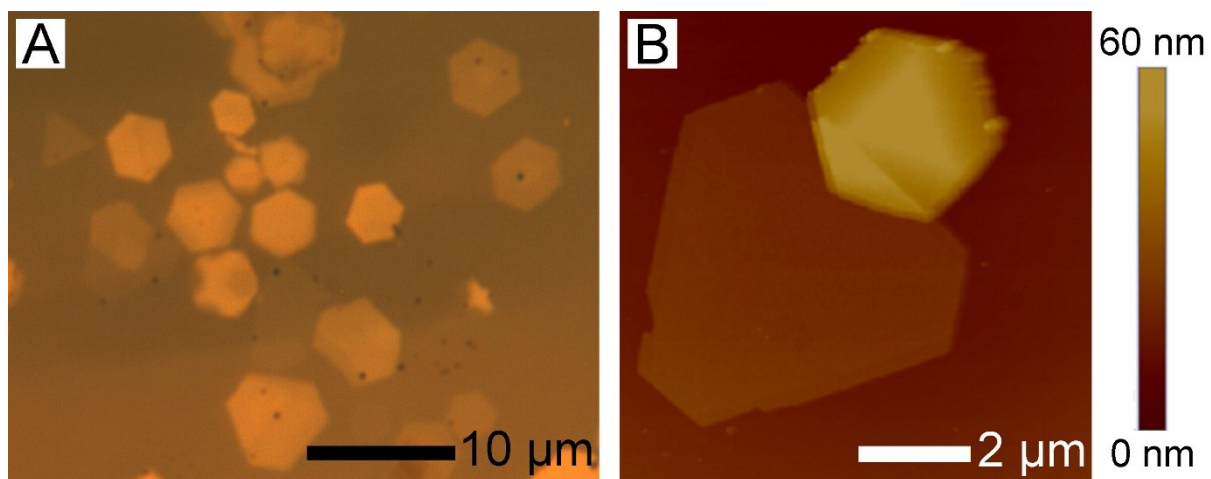

**Fig. S3** Characterization of  $\text{Bi}_2\text{Se}_3$  microplates on the Si substrate. (A) OM image and (B) AFM height image of  $\text{Bi}_2\text{Se}_3$  microplates. OM, optical microscope; AFM, atomic force microscope.

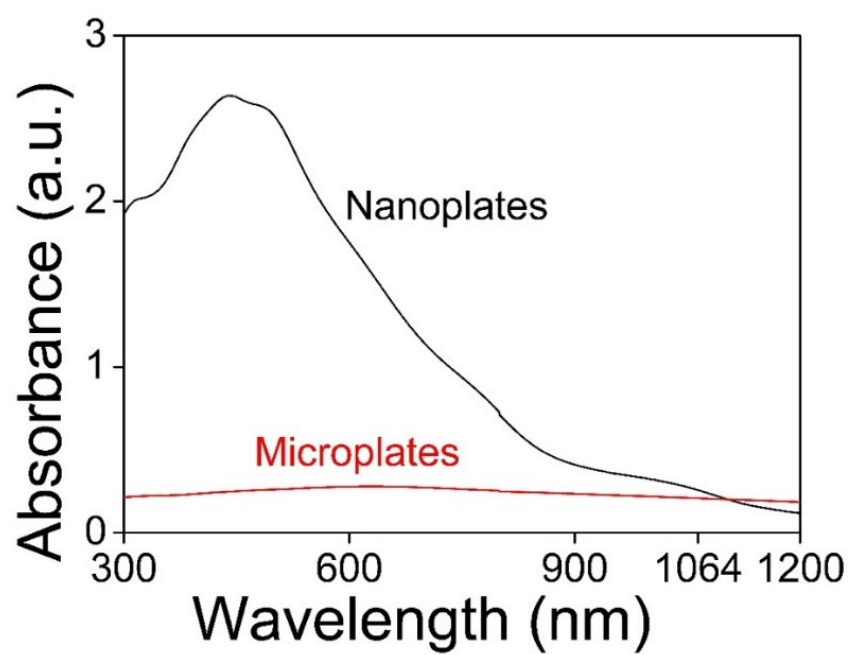

**Fig. S4** Absorption spectra of  $\text{Bi}_2\text{Se}_3$  nanoplates (black) and microplates (red).

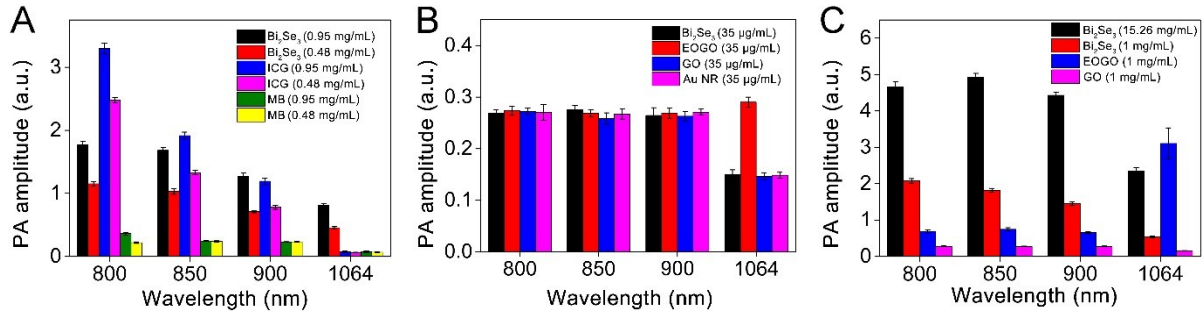

**Fig. S5** *In vitro* PA characteristics of various dyes in NIR region. (A) PA spectral response of Bi<sub>2</sub>Se<sub>3</sub> nanoplates, ICG, and MB (concentration: 0.95 mg/mL and 0.48 mg/mL). (B) PA spectral response of Bi<sub>2</sub>Se<sub>3</sub> nanoplates, EOGO, and GO (concentration: 35 µg/mL). (C) PA spectral response of Bi<sub>2</sub>Se<sub>3</sub> nanoplates, EOGO, GO, and Au NR (concentration: 1 mg/mL). The error bars represent +/- 1 standard deviation. PA, photoacoustic; NIR, near infrared; ICG, indocyanine green; MB, methylene blue; EOGO, edge-oxidized graphene oxide; GO, graphene oxide; Au NR, gold nanorod.

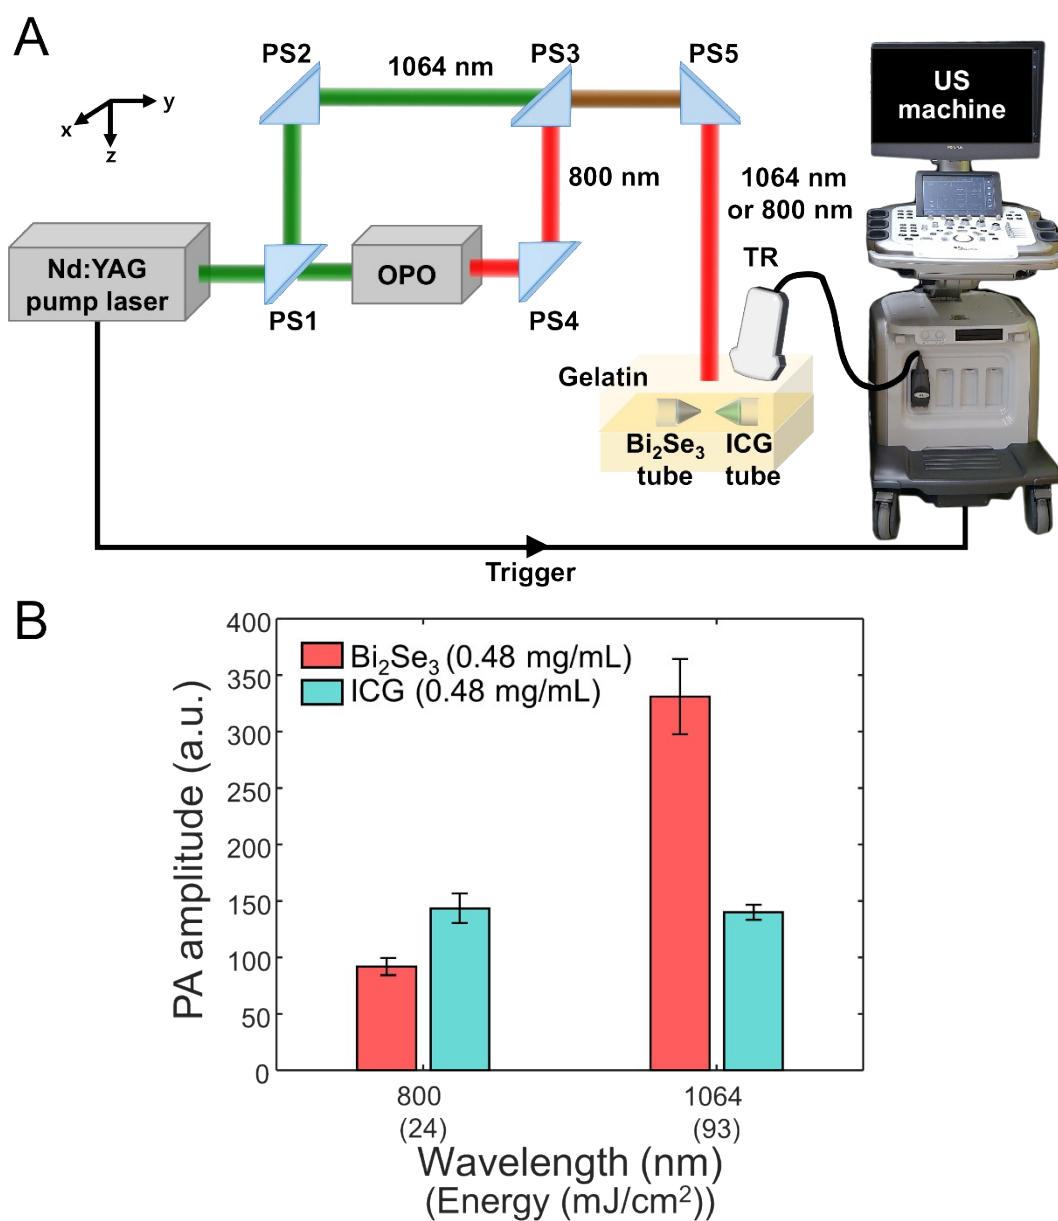

**Fig. S6** *In vitro* PA characteristics of Bi<sub>2</sub>Se<sub>3</sub> nanoplates and ICG at 800 nm and 1064 nm. (A) Experimental setup. (B) Quantified PA amplitude of the Bi<sub>2</sub>Se<sub>3</sub> nanoplates and ICG at 800 nm and 1064 nm. The error bars represent +/- 1 standard deviation. PA, photoacoustic; OPO, optical parametric oscillator; PS, prism; US, ultrasound; TR, ultrasound transducer; ICG, indocyanine green.

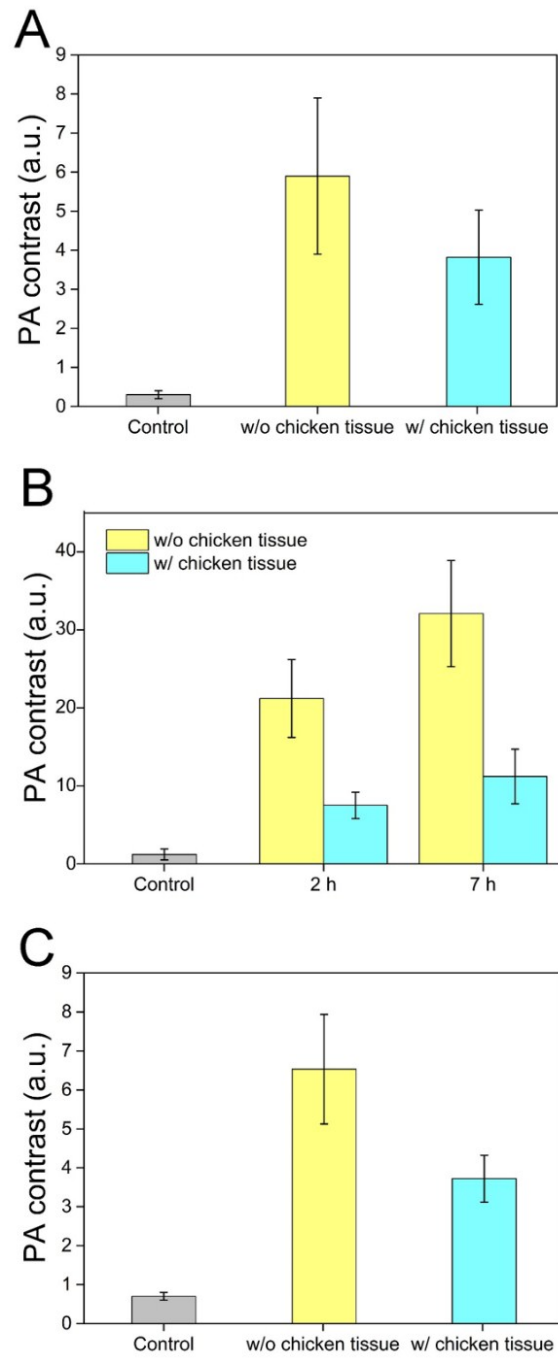

**Fig. S7** PA contrast quantification in all *in vivo* imaging. (A) PA contrast between the bladder area and the background. (B) PA contrast between the GI area and the background after 2 hours and 7 hours. (C) PA contrast between the SLNs and the background. The error bars represent  $\pm 1$  standard deviation. The PA contrasts were calculated as:  $(PA_{\text{region of interest}} - PA_{\text{background}})/PA_{\text{background}}$ . PA, photoacoustic; GI, gastrointestinal; SLN, sentinel lymph node.



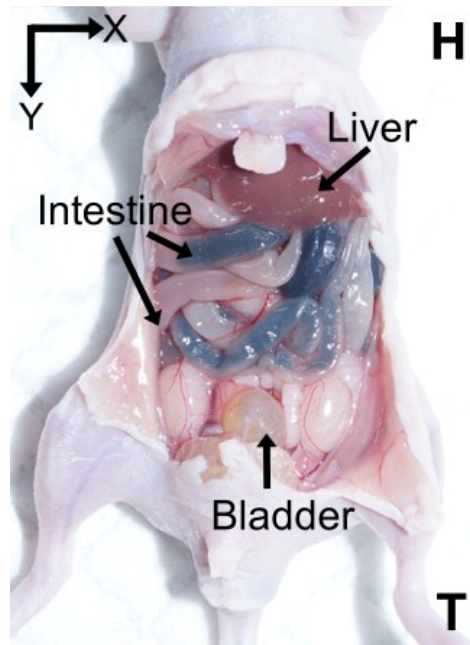

**Fig. S8** Photograph of the dissected mouse acquired after *in vivo* PA imaging of GI tract. The GI tract is dyed black, the color of  $\text{Bi}_2\text{Se}_3$  dispersion. PA, photoacoustic; GI, gastrointestinal; H, head; T, tail.
